# Supplementary material for: A SIMPLI (Single-cell Identification from MultiPLexed Images) approach for spatially-resolved tissue phenotyping at single-cell resolution
Source: PubMed Central journal article supplement (PMC8828885; doi:10.1038/s41467-022-28470-x), 2022-02-09
Supplement: 41467_2022_28470_MOESM3_ESM.pdf [file 41467_2022_28470_MOESM3_ESM.pdf]

### **Description of Additional Supplementary Files**

File Name: Supplementary Data 1

Description: Samples used in the study

File Name: Supplementary Data 2

Description: Antibodies used in the study
